# Supplementary material
Source: Elsevier journal article supplement (https://publikationen.ub.uni-frankfurt.de/files/5983/mmc1.doc)
Supplement: mmc1 [file mmc1.doc]

**Supplementary Material**


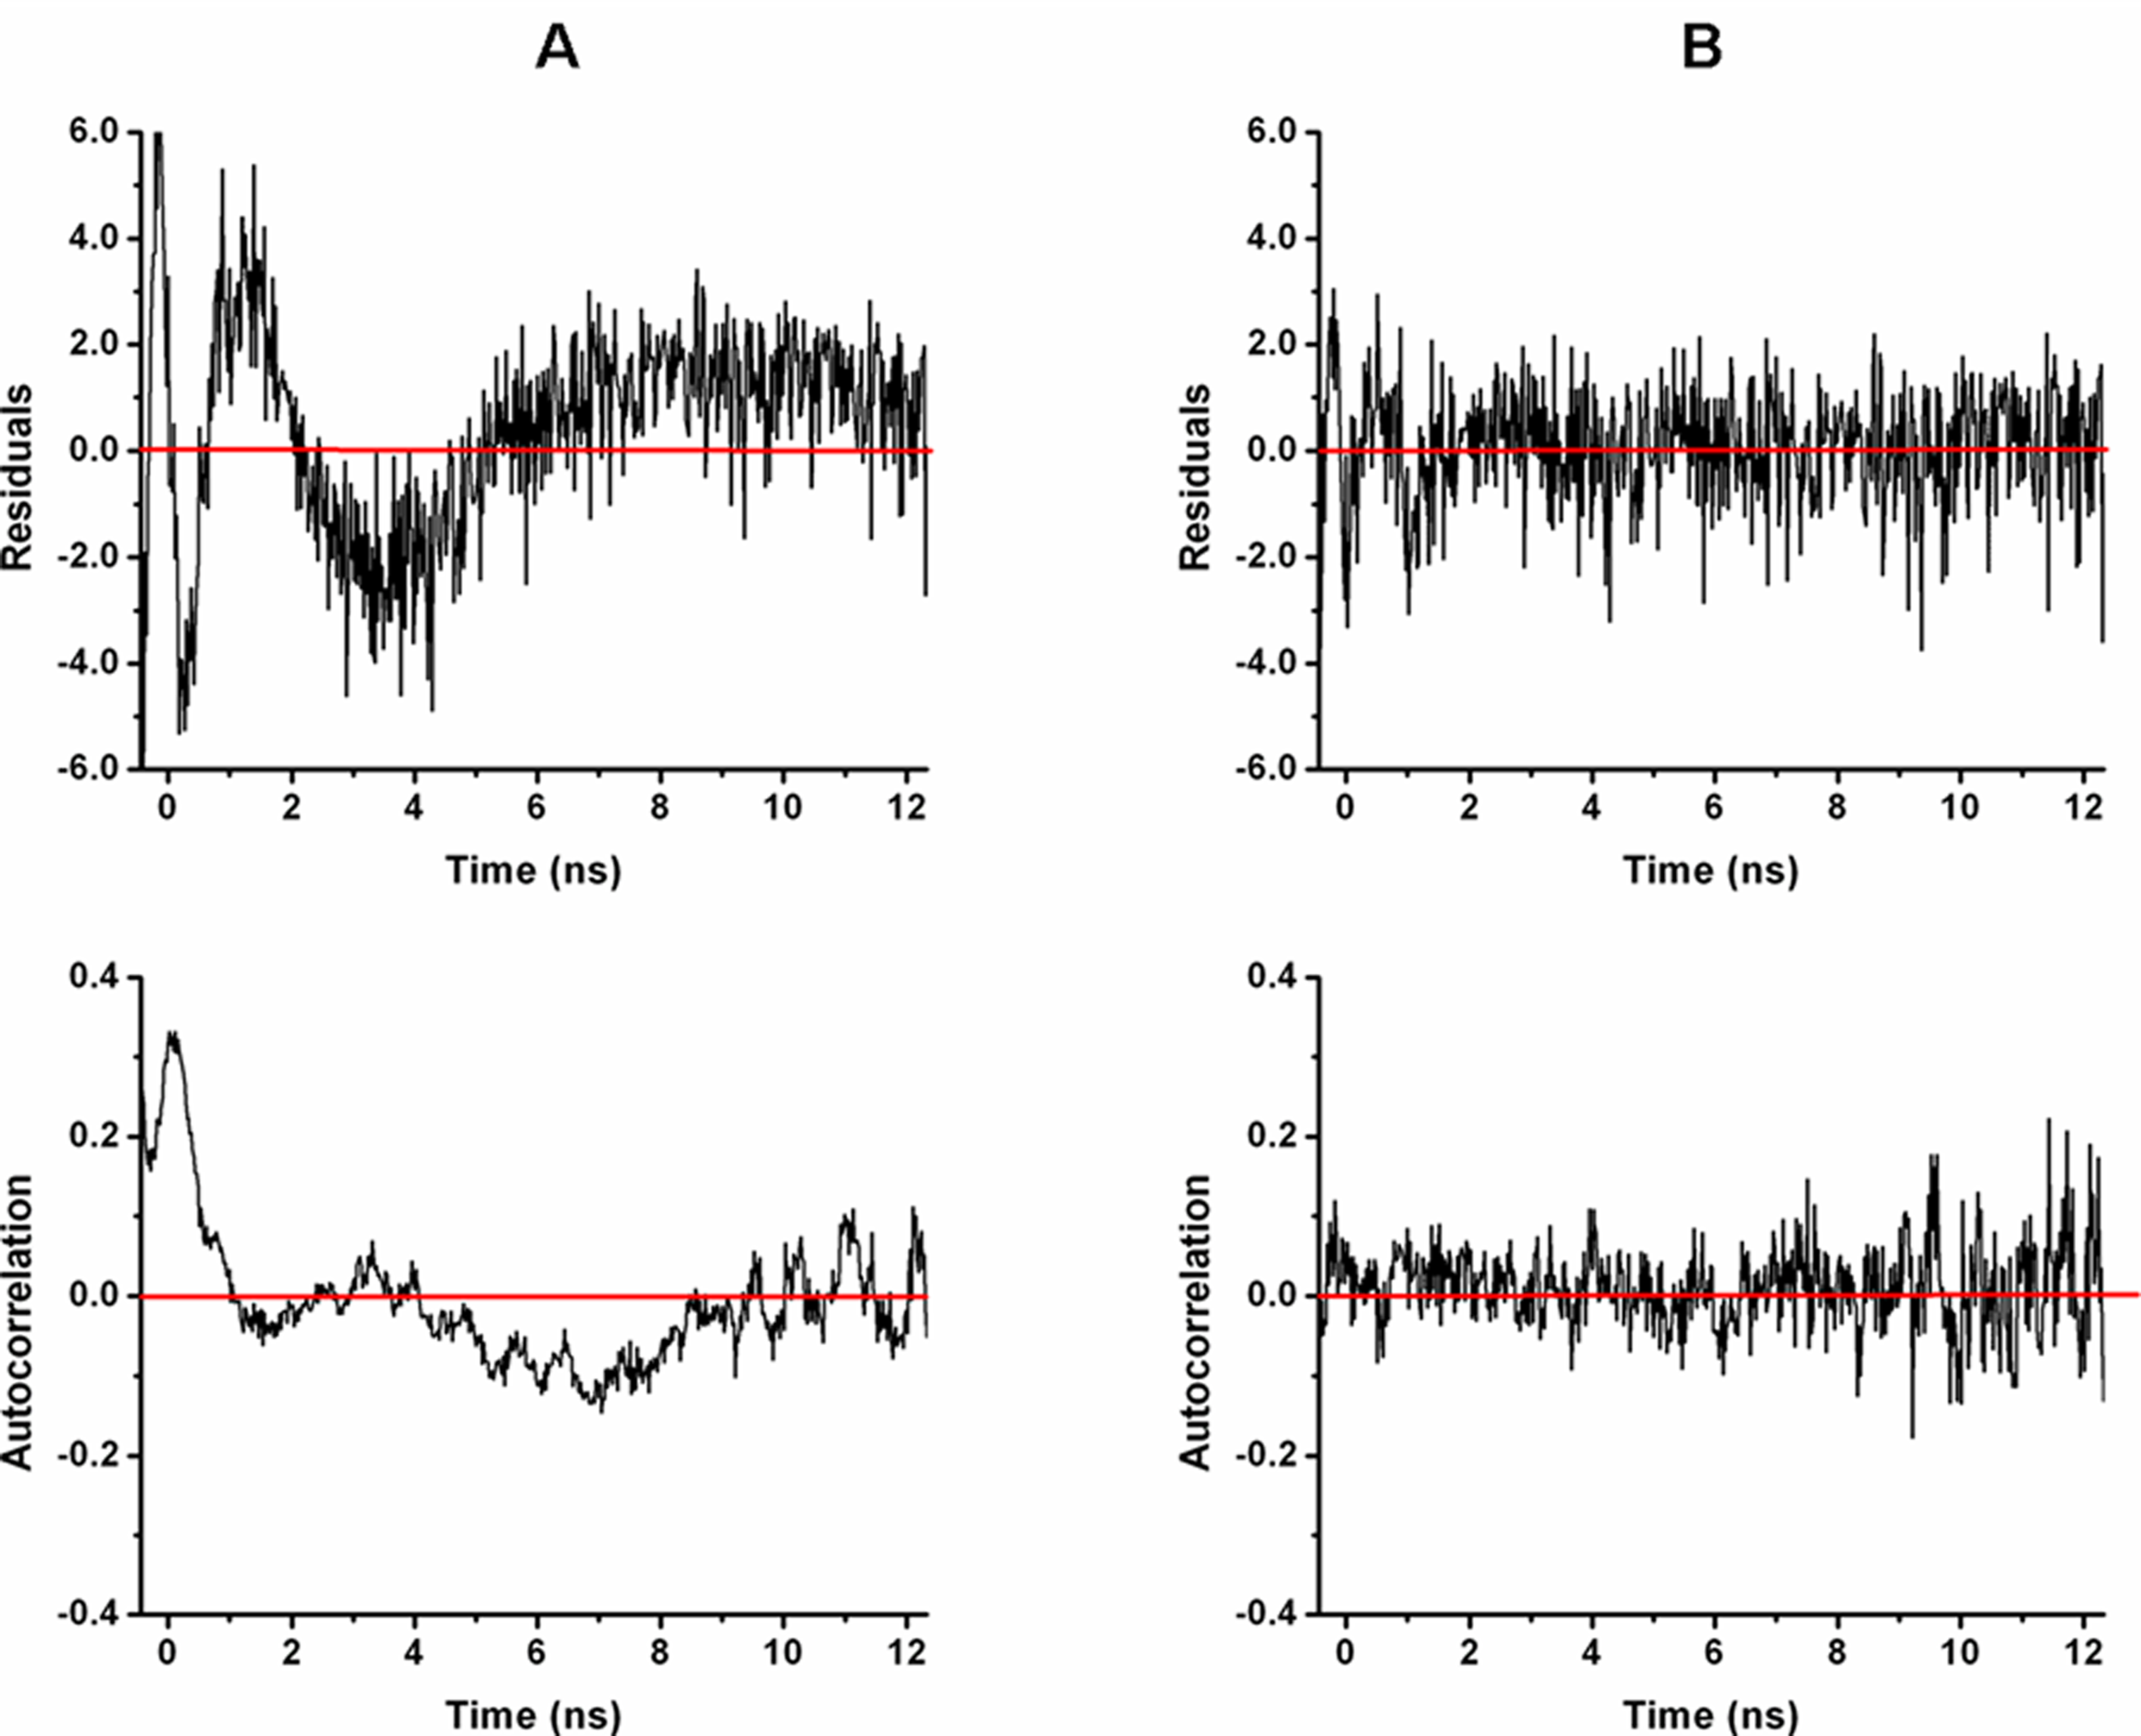


**Figure S1 Residue and autocorrelation curves of (A) two- and (B) three-component fit of decay obtained from a mitochondrial region of interest.** (A) Residuals (top) and autocorrelation (bottom) obtained by a bi-exponential fit showed large deviations from zero. (B) A four fold decrease in χ2 value for the three-decay-time model was adequate to reject the bi-exponential decay model. This significant improvement in the quality of fit when fitted with a three-exponential decay model is apparent from the random distribution of residues (top) and autocorrelation (bottom) around zero.


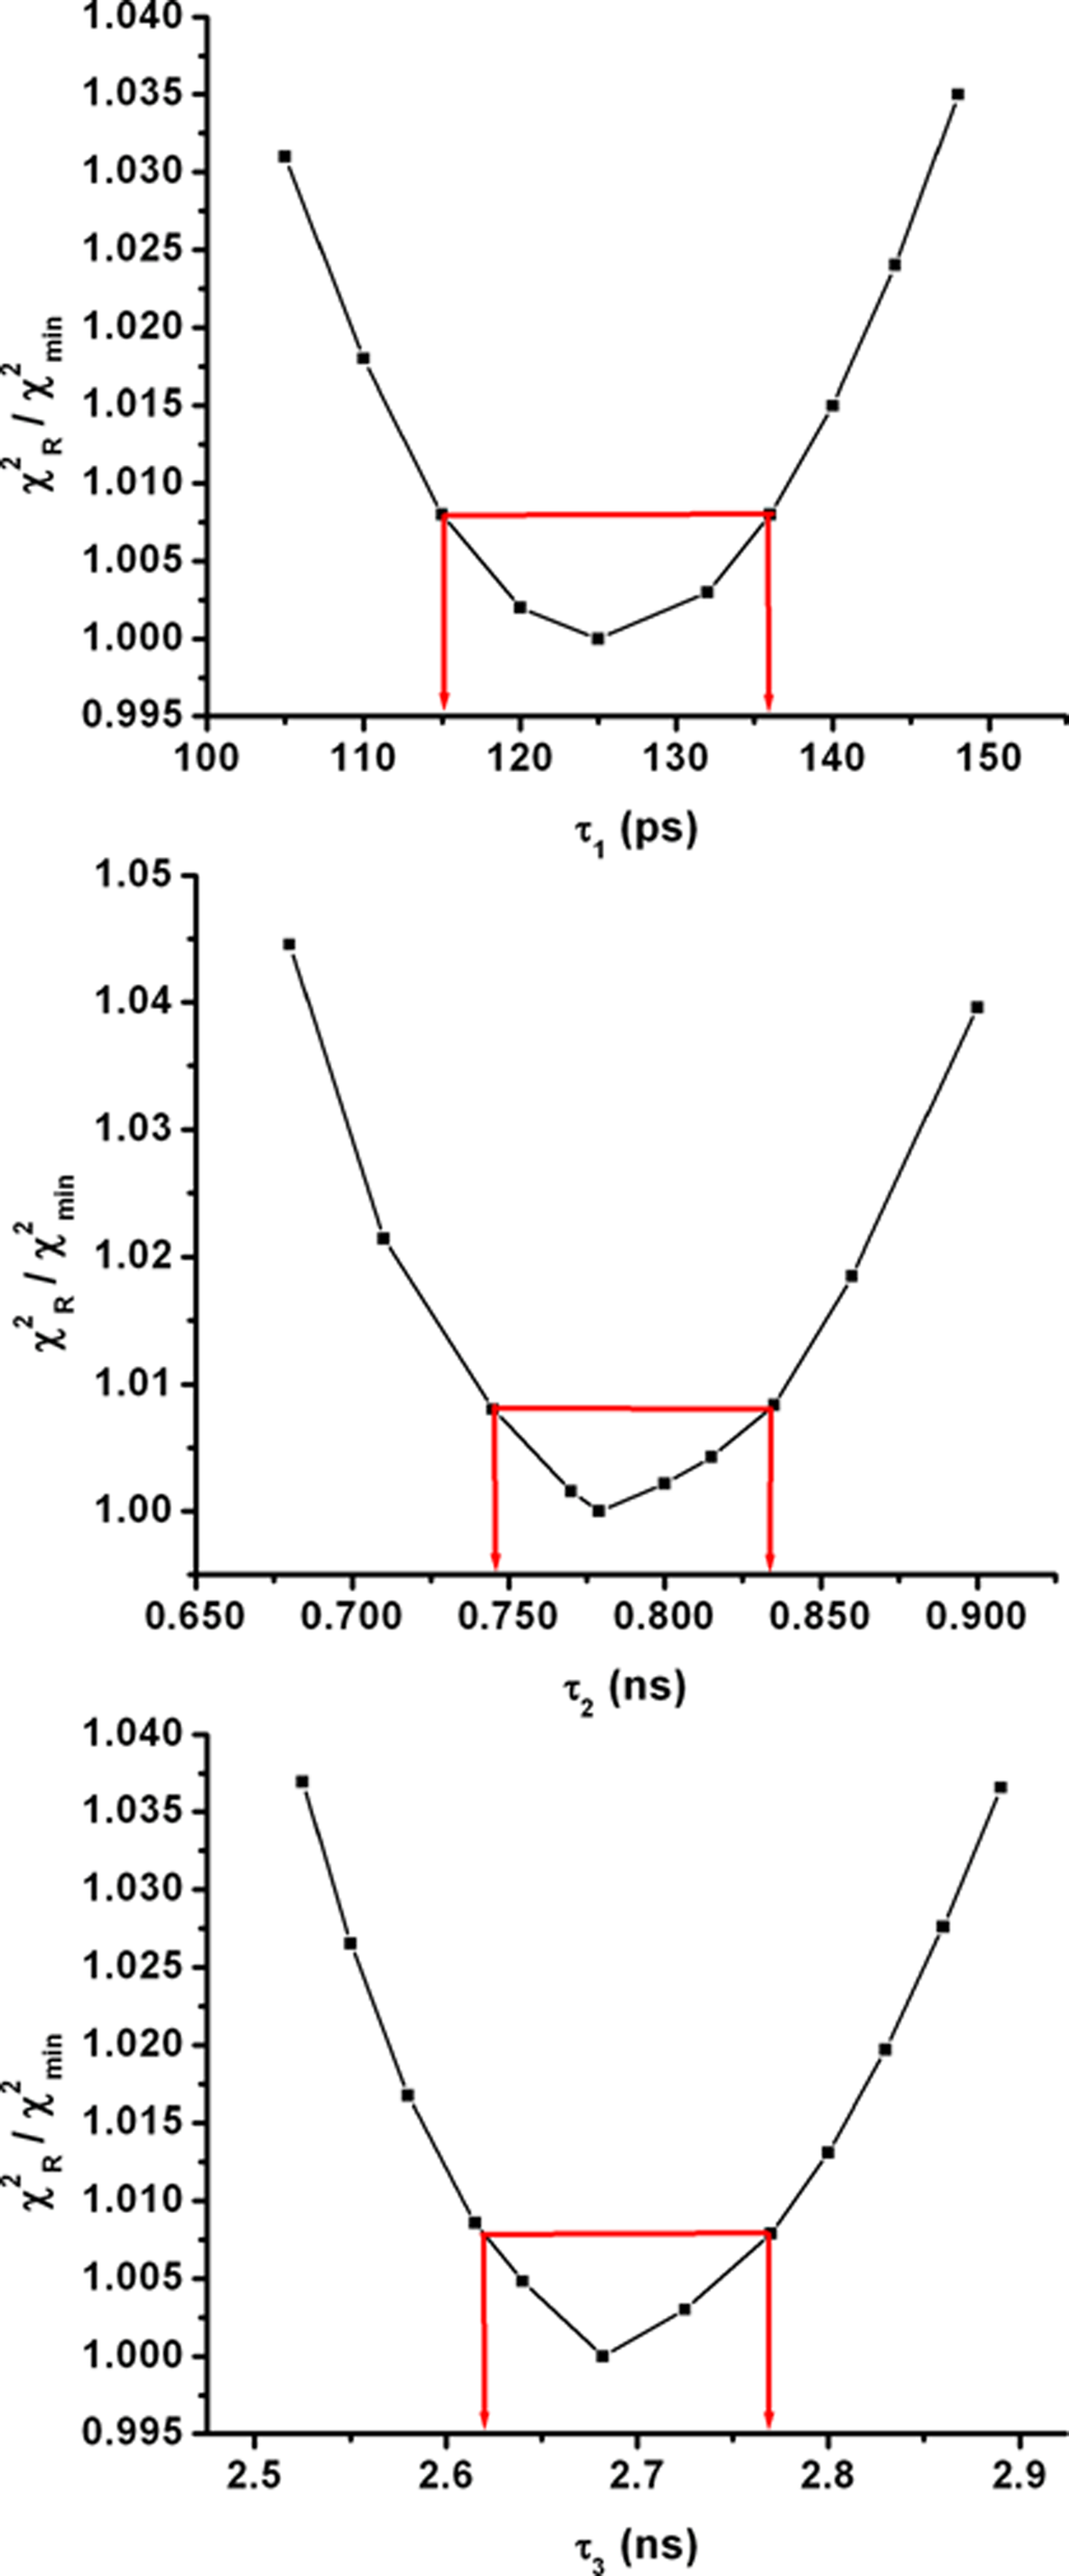


**Figure S2 Representative lifetime surfaces for the various** **i values obtained from the three-exponential fit of fluorescence from DASPMI stained mitochondria.** The confidence intervals are shown by the intercepts of the red horizontal line on the surfaces.

**
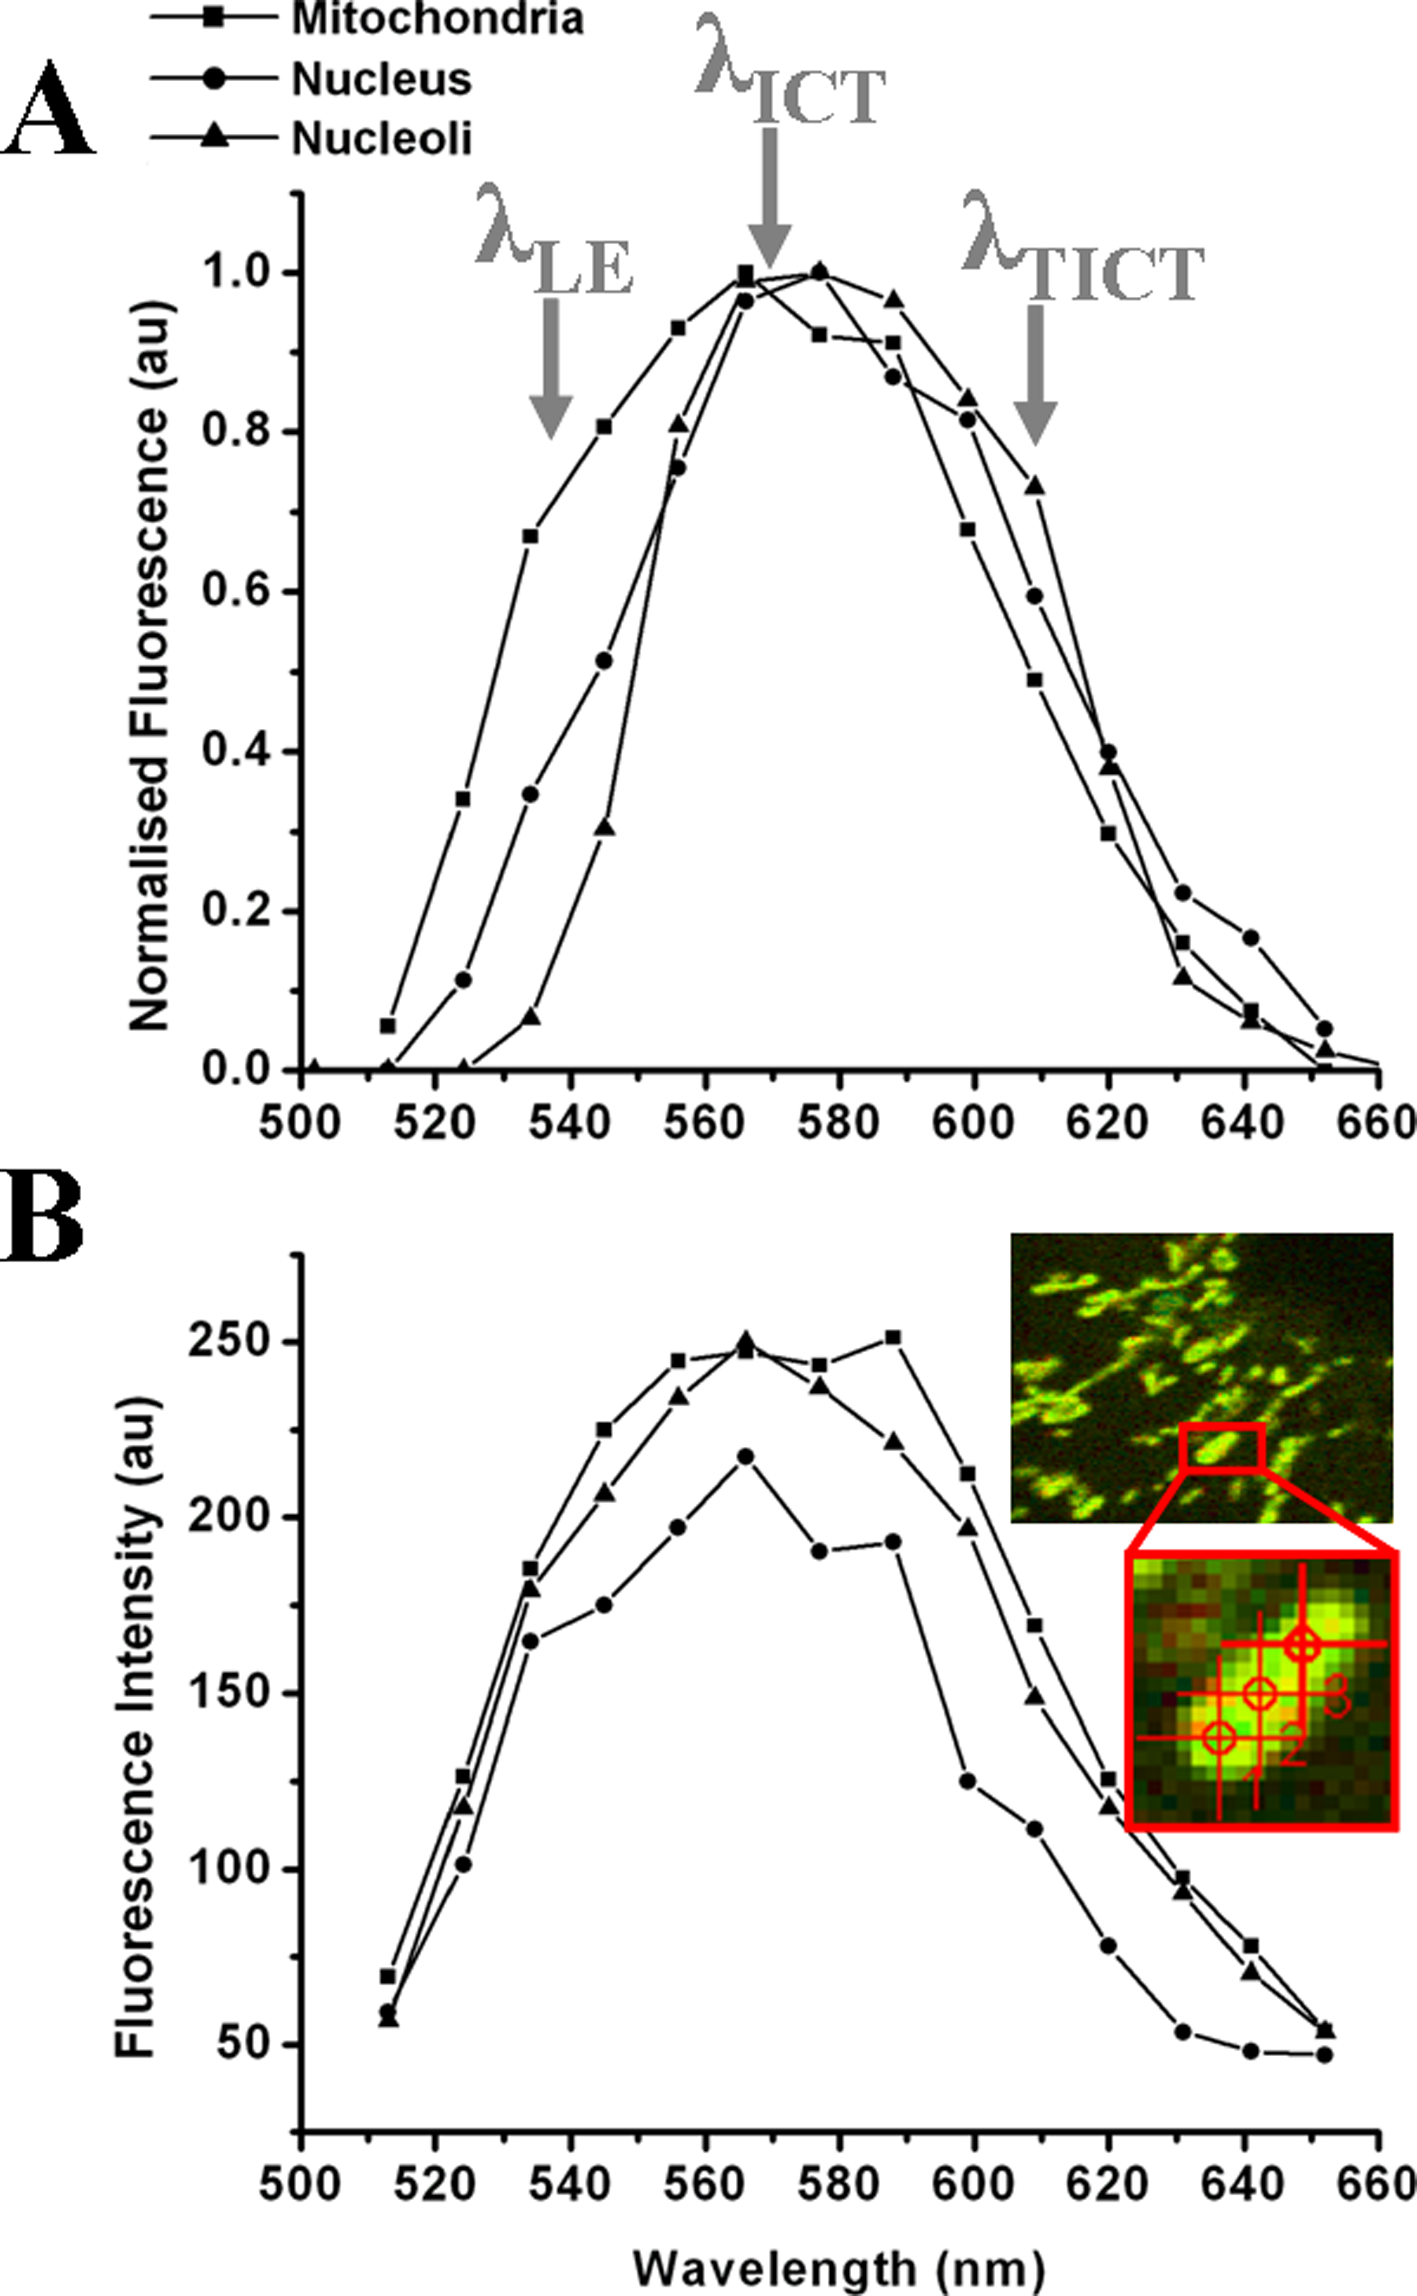
**

**Figure S3** **Emission fingerprints of DASPMI stained XTH2 cells (A) average over a few mitochondria, nucleus and nucleoli regions (B) three different regions of interest along single mitochondria.** Emission fingerprinting was done using laser scanning microscopy (Zeiss LSM 510 Meta). DASPMI-stained XTH2 (~ 3 µM conc.) cells kept in diluted HBSS solution were excited at 458 nm and emission was measured in the range of 500-670 nm. Apart from changes in emission intensity, variations in spectral characteristics due to different contributions of locally excited, ICT and TICT state are evident. In the case of nucleoli, the decrease of fluorescence from LE state and the increased contribution of TICT state are evident. Previously, investigation of time-resolved emission spectra of DASPMI in chloroform revealed a shoulder at shorter wavelengths pertaining to the locally excited state. The absence of green shoulder in the emission spectra of nucleoli is in accord with the more polar environment in ribonucleoprotein assemblies.


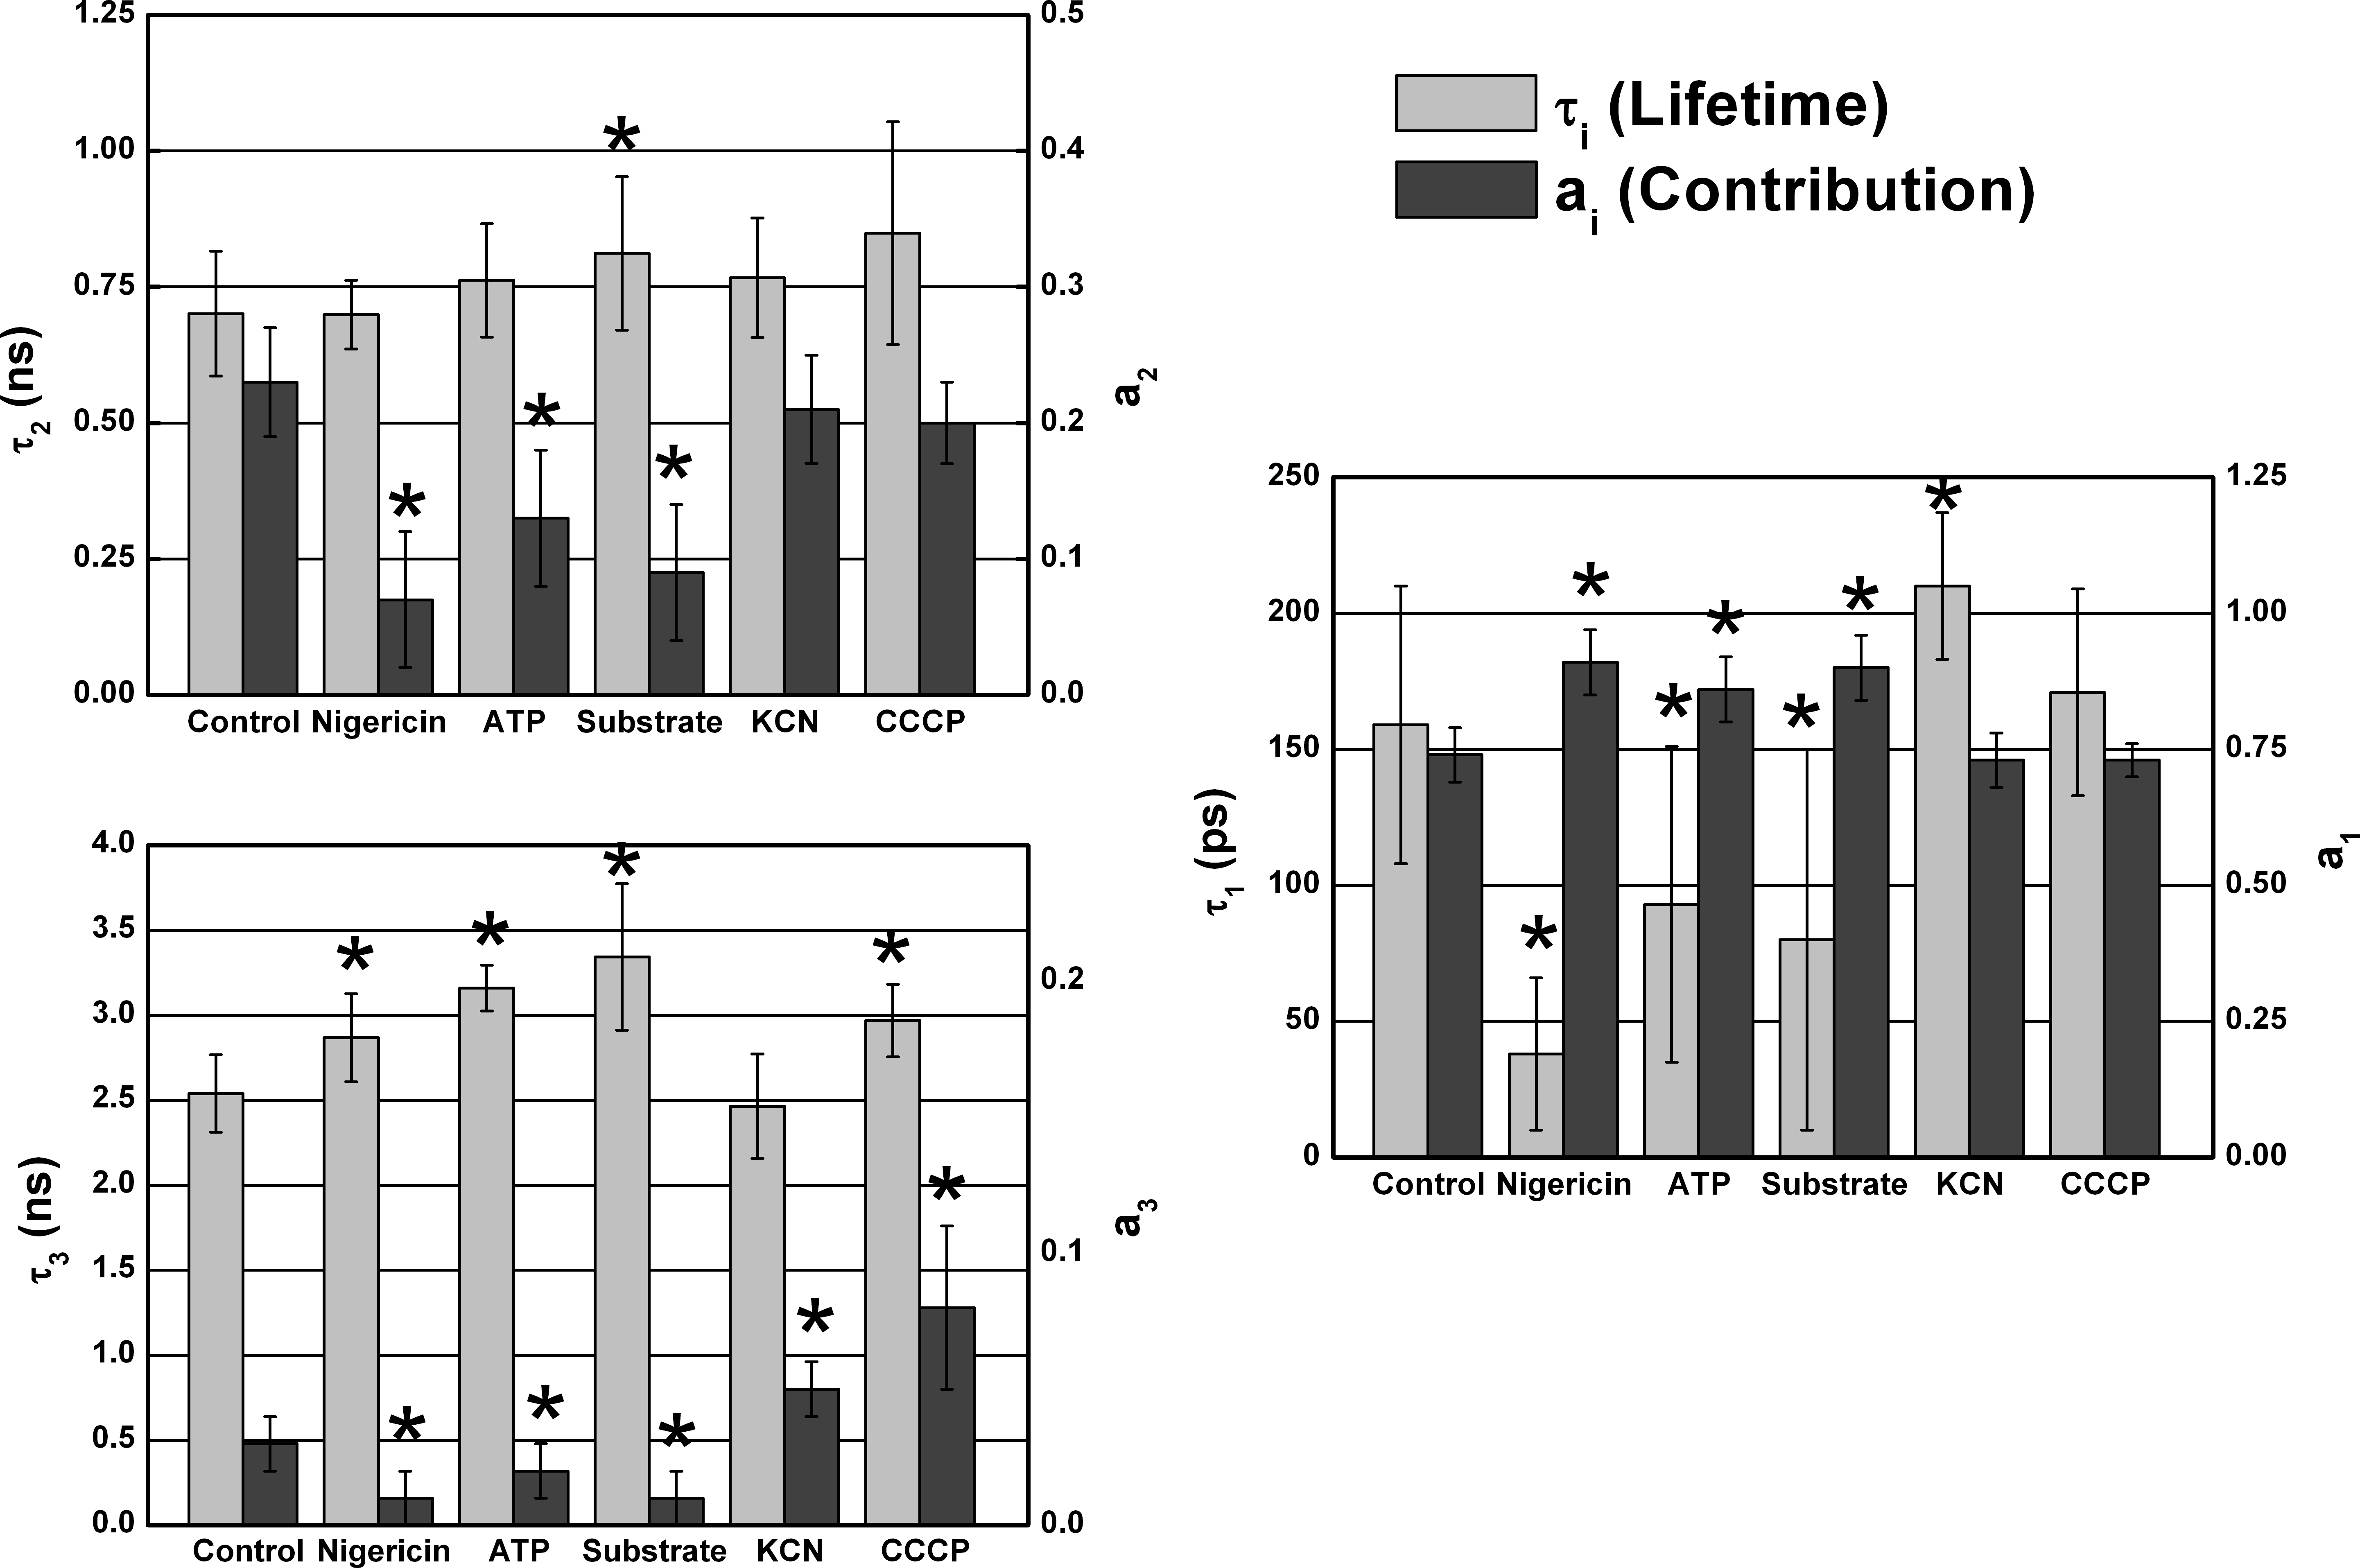


**Figure S4 Mean and standard deviation of mitochondrial DASPMI fluorescence decay parameters under various membrane potential manipulating conditions**. All decay parameters were obtained by global analysis of fluorescence decays obtained from mitochondria (defined by separating a series of region-of-interest containing mitochondria only). The measurements were done under control conditions (n= 20 cells each) and by manipulating mitochondrial activity (n= 4 cells each). Significant differences (P < 0.05) exist between decay parameters under control and on conditions influencing mitochondrial membrane potential (*).
